# Supplementary material for: Fuzzy based binary feature profiling for modus operandi analysis
Source: PeerJ journal article supplement (doi:10.7717/peerj-cs.65), 2016-06-13
Supplement: balloonsDataset.xlsx [file balloonsDataset.xlsx]

## Sheet: adult-stretchMe
1	0	1	0	1	0	1	0	1
1	0	1	0	1	0	0	1	1
1	0	1	0	0	1	1	0	1
1	0	1	0	0	1	0	1	2
1	0	1	0	0	1	0	1	2
1	0	0	1	1	0	1	0	1
1	0	0	1	1	0	0	1	1
1	0	0	1	0	1	1	0	1
1	0	0	1	0	1	0	1	2
1	0	0	1	0	1	0	1	2
0	1	1	0	1	0	1	0	1
0	1	1	0	1	0	0	1	1
0	1	1	0	0	1	1	0	1
0	1	1	0	0	1	0	1	2
0	1	1	0	0	1	0	1	2
0	1	0	1	1	0	1	0	1
0	1	0	1	1	0	0	1	1
0	1	0	1	0	1	1	0	1
0	1	0	1	0	1	0	1	2
0	1	0	1	0	1	0	1	2
