# Supplementary material for: Fuzzy based binary feature profiling for modus operandi analysis
Source: PeerJ journal article supplement (doi:10.7717/peerj-cs.65), 2016-06-13
Supplement: lensesDataset.xlsx [file lensesDataset.xlsx]

## Sheet: lenses.data
1	0	0	1	1	1	3
1	0	0	1	1	0	2
1	0	0	1	0	1	3
1	0	0	1	0	0	1
1	0	0	0	1	1	3
1	0	0	0	1	0	2
1	0	0	0	0	1	3
1	0	0	0	0	0	1
0	1	0	1	1	1	3
0	1	0	1	1	0	2
0	1	0	1	0	1	3
0	1	0	1	0	0	1
0	1	0	0	1	1	3
0	1	0	0	1	0	2
0	1	0	0	0	1	3
0	1	0	0	0	0	3
0	0	1	1	1	1	3
0	0	1	1	1	0	3
0	0	1	1	0	1	3
0	0	1	1	0	0	1
0	0	1	0	1	1	3
0	0	1	0	1	0	2
0	0	1	0	0	1	3
0	0	1	0	0	0	3
